# Supplementary material for: Non-invasive surrogate markers of pulmonary hypertension are associated with poor survival in patients with cancer
Source: PubMed Central journal article supplement — BMJ Open Respir Res. 2024 Aug 22;11(1):e001916. doi: 10.1136/bmjresp-2023-001916 (PMC11344493; doi:10.1136/bmjresp-2023-001916), 2024-08-22
Supplement: bmjresp-11-1-s001.pdf [file bmjresp-11-1-s001.pdf]

1 **Supplementary Figures and Legends**

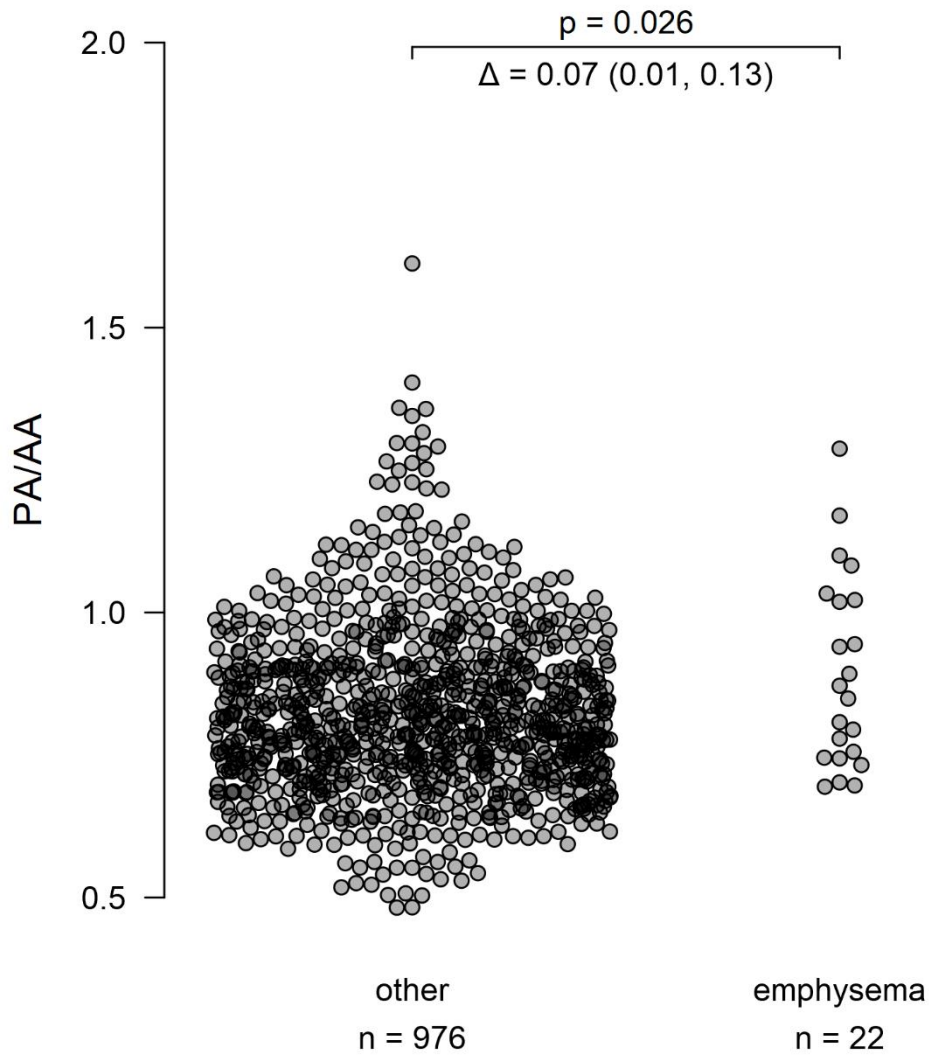

2

3 **Supplementary Figure 1**

4 Emphysema= Existence of emphysema in a patient assessed by a thorax CT-scan and a  
5 FEV1/FVC<0.7 on pulmonary function testing at baseline. Other= all other patients of the  
6 cohort. Dots represent PA/A ratio of each individual patient at baseline.

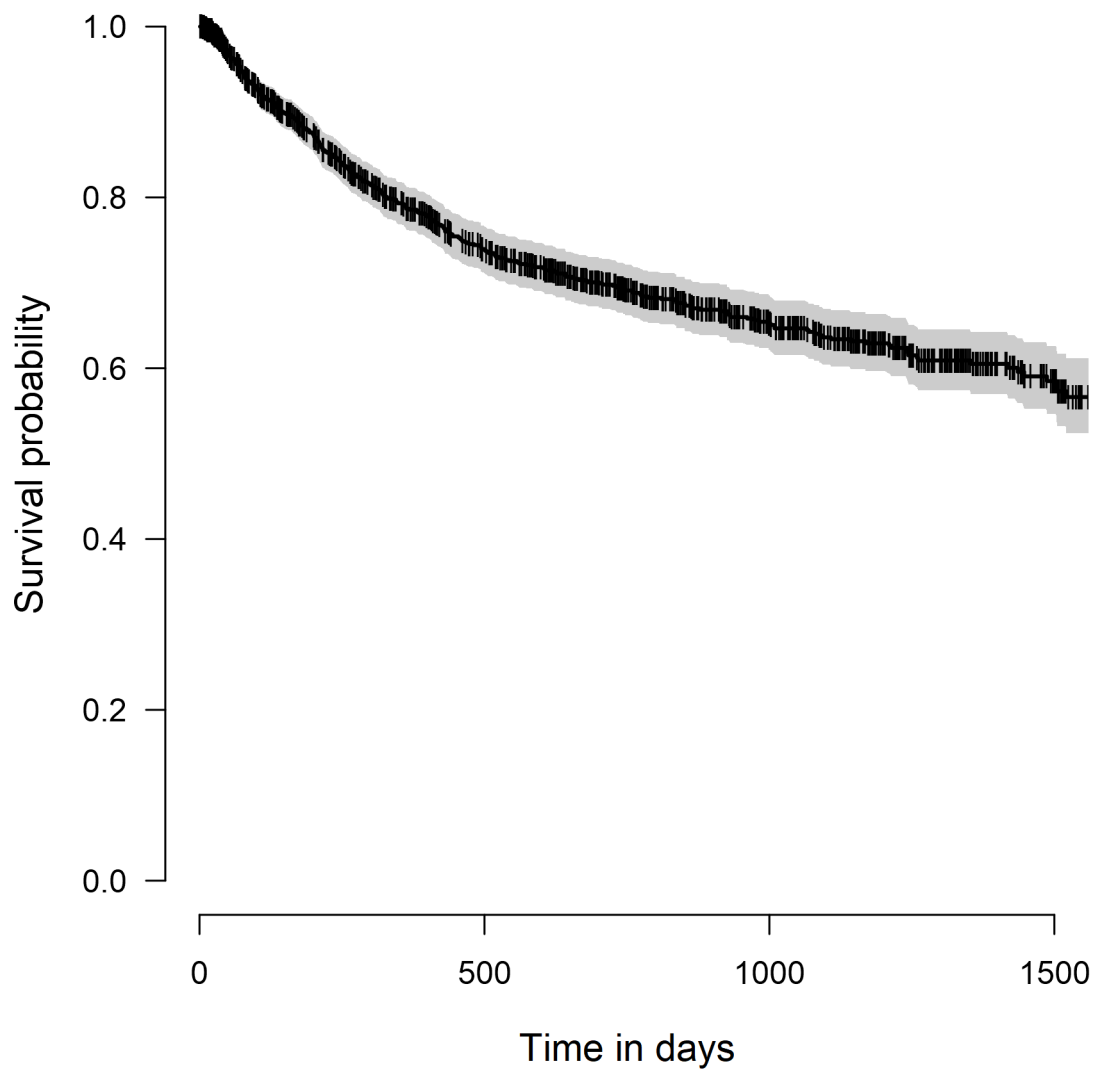

1

2 **Supplementary Figure 2**

3 Overall survival of all patients of the entire cohort using a Cox proportional hazards (Cox PH)  
4 model adjusting for sex, age, cancer and Union for international cancer control (UICC) stage.  
5 Figure shows the Kaplan-Meier curve with its 95% confidence interval.

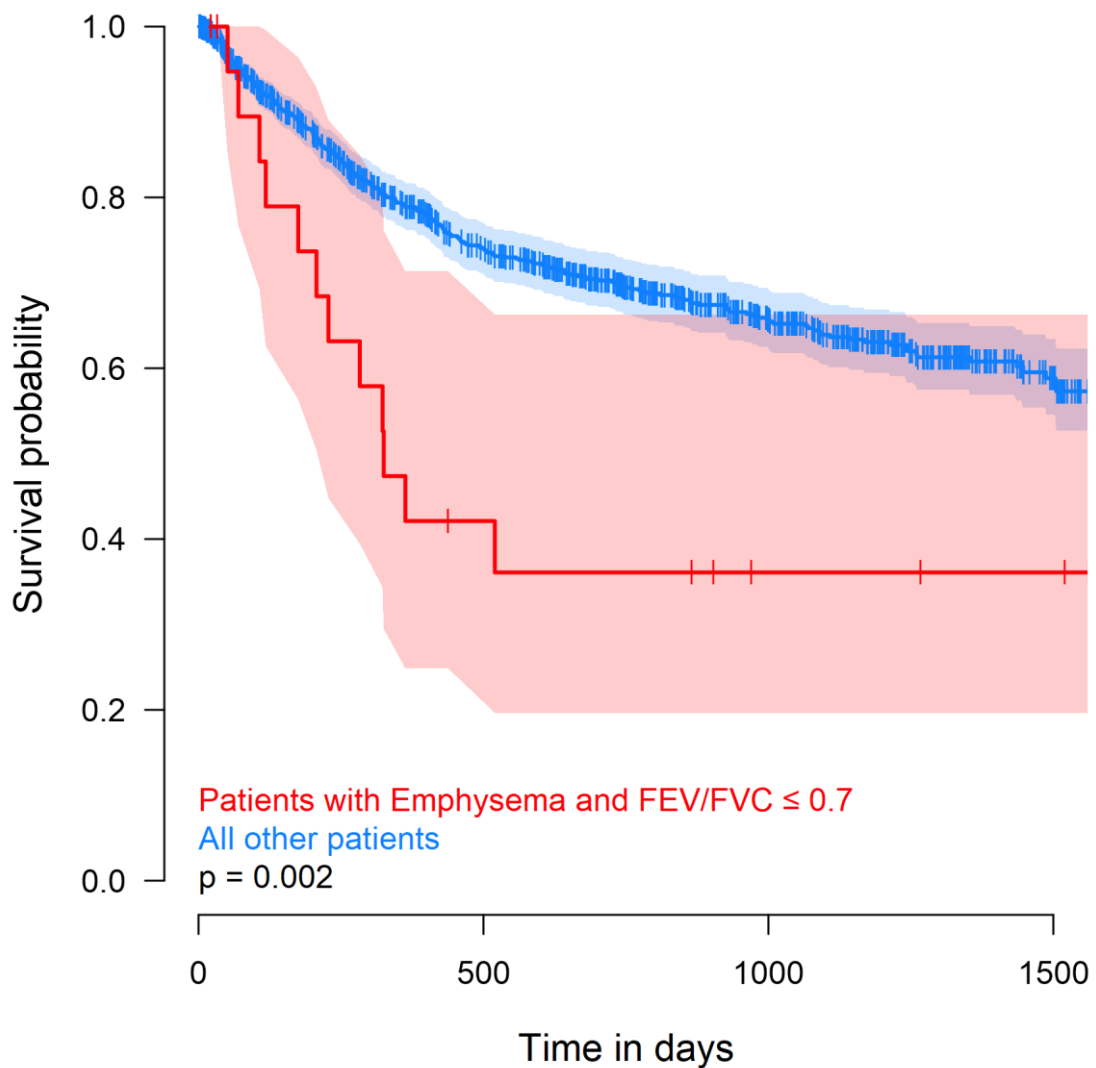

1  
2

3 **Supplementary Figure 3**

4 Overall survival (OS) of patients stratified by existence of emphysema in a patient assessed  
 5 by a thorax CT-scan and a FEV1/FVC<0.7 on pulmonary function testing at baseline. The  
 6 impact of emphysema was analyzed using Cox proportional hazards (Cox PH) models  
 7 adjusting for sex, age, cancer and Union for international cancer control (UICC) stage. Figure  
 8 shows the Kaplan-Meier curves with their 95% confidence intervals stratified for the existence  
 9 of emphysema and the p-value is from the Cox proportional hazard model.
